# Supplementary material for: A Novel G-Quadruplex Binding Protein in Yeast—Slx9
Source: Molecules. 2019 May 7;24(9):1774. doi: 10.3390/molecules24091774 (PMC6539110; doi:10.3390/molecules24091774)
Supplement: Supplementary file 1 [file molecules-24-01774-s001.pdf]

## Supplementary online Material

### Supplemental File S1: Yeast and bacteria strains used in this study.

Yeast strains used in this study.

| Strain   | Genotype                                                                          | Source       | Experiment |
|----------|-----------------------------------------------------------------------------------|--------------|------------|
| W303     | <i>MATa ura3-1 trp1Δ 2 leu2-3, 112 his3-11,15 ade2-1 can1-100</i>                 | R. Rothstein | wild type  |
| Y1H Gold | <i>MATa ura3-52 his3-200 ade2-101 trp1-901 leu2-3, 112 gal4Δ gal80Δ met- MEL1</i> | Clontech     | Y1H        |
| YPH500   | <i>MATa ura3-52 lys2-801 ade2-101 trp1Δ63 his3Δ200 leu2Δ1</i>                     | [26]         | GCR        |

Yeast strains created in this study.

| Name   | Genotype                                             | Created by | Experiment               |
|--------|------------------------------------------------------|------------|--------------------------|
| SG46   | Y1HGold G4 <sub>IX</sub>                             | SG         | Y1H                      |
| SG101  | Y1HGold G4 <sub>mut</sub>                            | SG         |                          |
| SG386  | W303 <i>slx9::TRP1</i>                               | SG         |                          |
| SG917  | W303 <i>slx9::TRP1 sgs1::HIS3</i>                    | SG         | Growth assay, spot assay |
| SG922  | W303 <i>sgs1::HIS3</i>                               | SG         |                          |
| KP77   | W303 <i>pif1-m2</i>                                  | [8]        |                          |
| SP2F4  | W303 <i>slx9::TRP1 pif1-m2</i>                       | SP         | Spot assay               |
| SG1010 | W303 <i>Slx9-Myc TRP1</i>                            | SG         |                          |
| SP2F7  | W303 <i>sgs1::HIS3 Slx9-Myc TRP1</i>                 | SP         |                          |
| SG1023 | YPH500 <i>sgs1::HIS3</i>                             | SG         | GCR                      |
| KW200  | YPH500 <i>prb1::control-sequence-LEU2</i>            | [28]       |                          |
| SG1076 | YPH500 <i>prb1::control-sequence-LEU2 sgs1::HIS3</i> | SG         |                          |
| SG431  | YPH500 <i>slx9::TRP1</i>                             | SG         |                          |
| SG66   | YPH500 <i>prb1::G4<sub>IV</sub>-LEU2</i>             | SG         |                          |
| SG654  | YPH500 <i>prb1::G4<sub>IV</sub>-LEU2 slx9::TRP1</i>  | SG         |                          |
| KW203  | YPH500 <i>prb1::G-rich-LEU2</i>                      | [28]       |                          |
| SB17   | YPH500 <i>prb1::G-rich-LEU2 slx9::TRP1</i>           | SB         |                          |
| SB21   | YPH500 <i>prb1::control sequence-LEU2 slx9::TRP1</i> | SB         |                          |

Y1H screening strains created in this study. Shown is the bait sequence and the minimal inhibitory concentration of aureobasidin A, which was used in the screening and for the retransformations. G-tracts or C-tracts are in bold, mutations are marked red.

| Strain                      | Bait sequence (5'-3')                                                                                                                                                                                                        | AbA [ng/ml] |
|-----------------------------|------------------------------------------------------------------------------------------------------------------------------------------------------------------------------------------------------------------------------|-------------|
| SG46<br><i>bait-G4</i>      | G4 chromosome IX (G4 <sub>IX</sub> ):<br>TCCGAAATTTTGATTTGGAGACTGATTTGGAGGGTACGGTGGGTAATAAGG<br>GAAGGTATC <b>GGG</b> ATTGGGGTAGGCCATTAAGGGATAATTCCATTGCCATTG                                                                 | 100         |
| SG101<br><i>bait-mut-G4</i> | Mutated G4 chromosome IX (mut-G4 <sub>IX</sub> ):<br>TCCGAAATTTTGATTTGGAGACTGATTTG <b>CAGCG</b> TACGGT <b>GCG</b> TAATA <b>ACG</b><br><b>CAAGC</b> TATC <b>GCG</b> ATTG <b>CCG</b> TAG <b>CC</b> CATTAAGGGATAATTCCATTGCCATTG | 400         |

*E. coli* strains used in this study.

| Strain        | Genotype                                                                                                                                                                                                                                                                                                                       | Source     | Experiment        |
|---------------|--------------------------------------------------------------------------------------------------------------------------------------------------------------------------------------------------------------------------------------------------------------------------------------------------------------------------------|------------|-------------------|
| DH5α          | <i>F</i> <sup>-</sup> $\phi$ 80 <i>dlacZ</i> Δ <i>M15</i> <i>endA1</i> <i>recA1</i> <i>hsdR17</i> ( <i>r</i> <sub>K</sub> <sup>-</sup> , <i>m</i> <sub>K</sub> <sup>+</sup> )<br><i>supE44</i> <i>thi-1</i> <i>gyrA96</i> ( <i>Nal</i> <sup>r</sup> ) <i>relA1</i> Δ( <i>lacZYA-argF</i> ) <i>U169</i> λ <sup>-</sup>          | [64]       | Cloning           |
| XL1-Blue      | <i>endA1</i> <i>gyrA96</i> ( <i>nal</i> <sup>R</sup> ) <i>thi-1</i> <i>recA1</i> <i>relA1</i> <i>lac</i> <i>glnV44</i><br><i>F'</i> [:: <i>Tn10</i> <i>proAB</i> <sup>+</sup> <i>lacI</i> <sup>q</sup> Δ( <i>lacZ</i> ) <i>M15</i> ] <i>hsdR17</i> ( <i>r</i> <sub>K</sub> <sup>-</sup> , <i>m</i> <sub>K</sub> <sup>+</sup> ) | Stratagene | Y1H               |
| Rosetta pLysS | <i>F</i> <sup>-</sup> <i>ompT</i> <i>hsdS</i> <sub>B</sub> ( <i>r</i> <sub>B</sub> <sup>-</sup> <i>m</i> <sub>B</sub> <sup>-</sup> ) <i>gal</i> <i>dcm</i> (DE3) pLysSRARE (Cam <sup>R</sup> )                                                                                                                                 | Novagen    | Slx9 purification |

*E. coli* strains created in this study.

| Name  | Genotype                     | Created by | Experiment        |
|-------|------------------------------|------------|-------------------|
| SG22  | DH5α pAbAi-G4 <sub>IX</sub>  | SG         | Y1H               |
| SG70  | DH5α pAbAi-G4 <sub>mut</sub> | SG         | Y1H               |
| SG45  | DH5α pRS415-G4 <sub>I</sub>  | SG         | GCR               |
| SG43  | DH5α pRS415-G4 <sub>IV</sub> | SG         | GCR               |
| SG146 | Rosetta pLysS pET28a-SLX9    | SG         | Slx9 purification |

**Supplemental File S2:** List of G4 folding oligodeoxynucleotides.

Sequences of oligonucleotides used for *in vitro* binding studies. Mutations are marked red, G-tracts of G4 motifs are printed in bold.

| Name               | Sequence 5'-3'                                                                                                   | Use                                                                             |
|--------------------|------------------------------------------------------------------------------------------------------------------|---------------------------------------------------------------------------------|
| G4 <sub>IX</sub>   | AAAAAAAAA <b>GGG</b> TACGGT <b>GGG</b> TAATAAG <b>GGG</b> AAGGTATC <b>GGG</b>                                    | G4-folding <i>in vitro</i>                                                      |
| G4 <sub>mut</sub>  | AAAAAAAAA <b>CG</b> TACGGT <b>CG</b> TAATAA <b>CGCAAGCT</b> ATC <b>GCG</b>                                       |                                                                                 |
| G4 <sub>TP</sub>   | AAAAAAAAA <b>GGGGG</b> AGCT <b>GGGG</b> TAGAT <b>GGG</b> AATGTGAG <b>GG</b>                                      |                                                                                 |
| G4 <sub>rDNA</sub> | AAAAAAAAA <b>GGG</b> TAAC <b>GGGG</b> AATAAG <b>GGG</b> TCGATTCCG GAGAG <b>GGG</b>                               |                                                                                 |
| dsDNA              | GACGCTGCCGAATTCTGGCTTGCTAGGACATCTTTGCCC<br>ACGTTGACCCG<br>CGGGTCAACGTGGGCAAAGATGTCCTAGCAAGCCAGAAT<br>TCGGCAGCGTC | Control DNA structures for <i>in vitro</i> binding studies. Sequences from [35] |
| <i>bubble</i>      | CGGGTCAACGTGGGCAAAGCCAATGCGATCGGCCAGAAT<br>TCGGCAGCGTC<br>GACGCTGCCGAATTCTGGCTTGCTCGGACATCTTTGCCC<br>ACGTTGACCCG |                                                                                 |

|               |                                                                                                                                                                                                                                            |  |
|---------------|--------------------------------------------------------------------------------------------------------------------------------------------------------------------------------------------------------------------------------------------|--|
| <i>fork</i>   | GACGCTGCCGAATTCTGGCTTGCTAGGACATCTTTGCCC<br>ACGTTGACCCG +<br>CGGGTCAACGTGGGCAAAGATGTCCTAGCAATGTAATCG<br>TCTATGACGTC                                                                                                                         |  |
| <i>4-fork</i> | GACGCTGCCGAATTCTGGCTTGCTAGGACATCTTTGCCC<br>ACGTTGACCCG +<br>CGGGTCAACGTGGGCAAAGATGTCCTAGCAATGTAATCG<br>TCTATGACGTC +<br>GACGTCATAGACGATTACATTGCTAGGACATGCTGTCTA<br>GAGACTATCGC +<br>GCGATAGTCTCTAGACAGCATGTCCTAGCAAGCCAGAAT<br>TCGGCAGCGTC |  |

**Supplemental File S3:** List of peaks of ChIP-seq.

**Supplemental File S4:** List of primers used in this study.

Sequences of oligodeoxynucleotides used for conventional ChIP–qPCR experiments.

| No. | Sequence 5'-3'        | Orientation | Feature                  |
|-----|-----------------------|-------------|--------------------------|
| 1   | ATAAAAGGTAGAAAGAATT   | fw          | Non-G-rich 1             |
|     | CGGTTTGGCTTGTATTGCC   | rev         |                          |
| 2   | ATATCAATACATCACACCTG  | fw          | Non-G-rich 2             |
|     | GGAAAAAAGAGCAGCAATAC  | rev         |                          |
| 3   | GCTGTCTGGTTAGTCTTCG   | fw          | G-rich 1                 |
|     | CTTCGTACAGACCTTCACCC  | rev         |                          |
| 4   | CCACCTACAGATTATAGAAG  | fw          | G-rich 2                 |
|     | CAAGGTGTATGACGTGCCG   | rev         |                          |
| 5   | GCTTCAGCCTGGGGTAAC    | fw          | XIIIb: G4 (Tract3), G4 1 |
|     | GGCACCATTAGATTCACCAC  | rev         |                          |
| 6   | AATCCCGTCGCTATGCTC    | fw          | XI: G4 (Tract3), G4 2    |
|     | CTCCCGGTCTGTTATTTTC   | rev         |                          |
| 7   | ATACGCAGTATGGTGATATC  | fw          | XV (Tract3) G4 3         |
|     | GTTTATTGCCGATATACCTC  | rev         |                          |
| 8   | CCCTTATCAAAGCAAATGCG  | fw          | Control 1                |
|     | GACCACTTGATTGACTAGATC | rev         |                          |
| 9   | CGATTATTAGTAGCGCAAAG  | fw          | Control 2                |
|     | CTTGTTATATCAATAACATG  | rev         |                          |

Sequences of oligodeoxynucleotides for expression quantification by qPCR.

| Sequence 5'-3'        | Orientation | Use                    |
|-----------------------|-------------|------------------------|
| TACAGTGCATGTGGTATGAC  | fw          | Expression <i>RTC2</i> |
| GAGCTATACGATTGGCTATC  | rev         |                        |
| ATCGCTAGATACTCCAATGG  | fw          | Expression <i>SKP2</i> |
| TAAGTGCAGTGATAGGAGAC  | rev         |                        |
| GTATCCAGGACTCATTTCAAC | fw          | Expression <i>PRB1</i> |
| TAGCCTCGACAATAGAGTC   | rev         |                        |
| GAAAGGCCGAACCTACGAGTG | fw          | Expression <i>PCD1</i> |

|                        |     |                           |
|------------------------|-----|---------------------------|
| GACCTCAGGATCATGCGG     | rev |                           |
| AATGGACAGTCCACGAAGC    | fw  | Expression <i>TMA10</i>   |
| TCTCATCGCCAGGCTTGC     | rev |                           |
| CCTAGCAAGAGTTGACTGC    | fw  | Expression <i>YPK2</i>    |
| TAGACTGAATCGTCCCTCG    | rev |                           |
| CCGAACGTAGGAGTAGCG     | fw  | Expression <i>IGD1</i>    |
| GTCTGTTGCCAGCACGAG     | rev |                           |
| CTGTTGTACGGCAATATCGA   | fw  | Expression <i>YLR312C</i> |
| TCCAGCCCATTAGGTCATC    | rev |                           |
| TAGGAGCAGCCCTGTACG     | fw  | Expression <i>RRT6</i>    |
| TCTTGCAACACGTCCATTAC   | rev |                           |
| CAGTCAAACCTTCCTATCGAG  | fw  | Expression <i>MDH2</i>    |
| ACAACACACTTATAACCGGC   | rev |                           |
| CGCTCCTCGTGCTGTCTTCC   | fw  | Expression Actin          |
| CAGGGTGTTCTTCTGGGGCAAC | rev |                           |
| CAGACATCAGCGTACTAGG    | fw  | Expression <i>UTP6</i>    |
| TGGCATAGTAACCCTTATGC   | rev |                           |

## Supplemental File S5: Supporting information for binding analysis.

Supplemental File 5, Götz et al., 2019

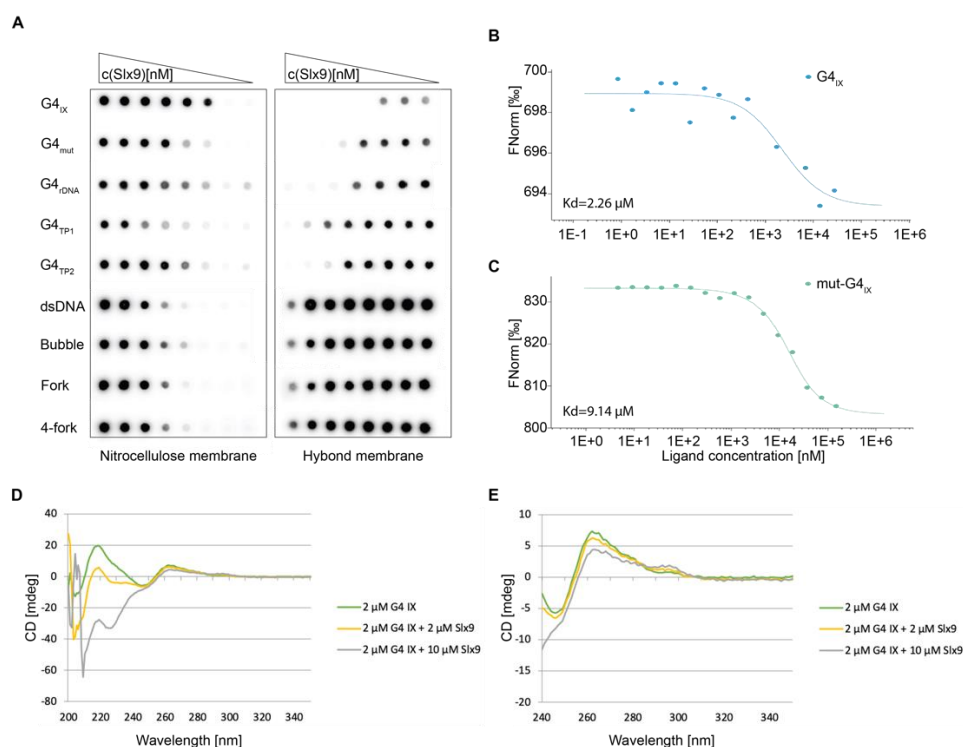

(A) Dotblot. (B) MST: Binding reactions were prepared in PBS supplemented with 400 mM NaCl, 0.5% BSA, and 0.05% Tween-20 in a total volume of 40 μL. For binding reactions 25 nM 5'Cy5-labeled oligonucleotides (folded G4s and controls) were used (see Supplementary Table S2). Different concentrations of Slx9 ranging from 27.5 μM to 0.03 nM and a constant concentration of DNA (25 nM) were used. (B,C) MST analysis was performed using standard capillaries from Nanotemper with LED 40%, 40% MST power, on the Monolith NT.115 instrument temperature 24 °C. (B) Slx9 binding to a G4 structure from chromosome IX was tested. (C) Slx9 binding to mutated G4 from chromosome IX. K<sub>d</sub> was calculated using the MO Affinity analysis software.

(D,E) CD spectra of folded oligonucleotides G4<sub>IX</sub> (green) plus the addition of 2 μM Slx9 and 10 μM Slx9, respectively. G4 structures show the distinct minimum (243 nm) and maximum (264 nm) peaks indicating the presence of a parallel G4. Upon Slx9 titration changes in

ellipticity between 200 and 300 nm are observed. (E) Zoom of second maxima peak in D. A minor decrease of the G4 peak (green) after Slx9 titration is detected indicating that no or only minor changes on G4 stability occur due to Slx9 binding. CD spectra were recorded on a Jasco J-810 spectropolarimeter at 20°C with parameters as described previously [28].

**Supplemental File S6:** Slx9 has no G4-mediated effect on genome stability or transcriptional changes.

**Supplemental File 6, Götz et al., 2019**

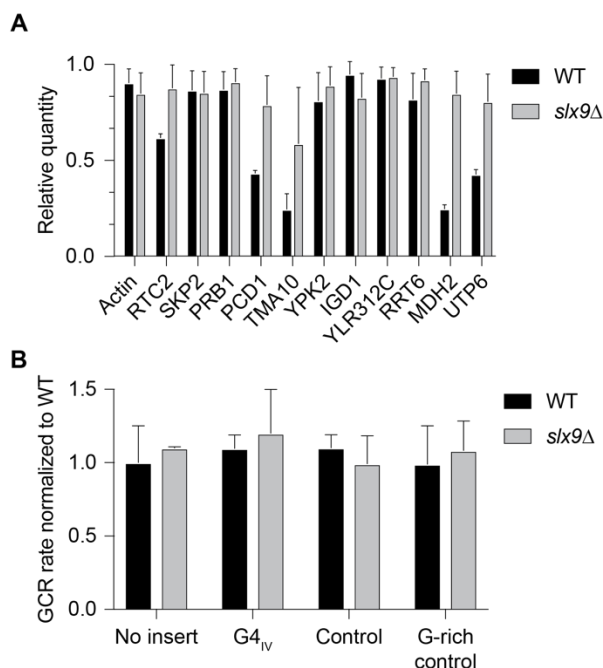

(A) Analysis of gene expression changes in *slx9Δ* strains (grey) compared to WT (black). (B) GCR analysis of *slx9Δ* strains. *slx9Δ* does not influence genome stability. Shown is the change of the GCR rate of the strain compared to wild type without insert at the *PRB1* locus  $\pm$  standard error. Biological replicates  $n = 3$ . Sequences (5'–3') of the inserts at the *PRB1* locus in the GCR strains. Only the relevant part of the insert is depicted.

G4<sub>IV</sub>: GGGGAGGGGAAGGGGAGGGG,

Control:

CTAATCTTTCAGCGTTGTAAATGTTGGTACCCAAACCCAATTGTCTACAAGTTTCCTTAGC,

G-rich

control:

ATGGTGGTCATCTCAGTAGATGTAGAGGTGAAAGTACCGGTCCATGGCTCGGT.

## **Supplemental Methods**

### *Gross chromosomal rearrangement assay*

The gross chromosomal rearrangement (GCR) assay was performed as published with minor modifications [54]. Seven colonies per strain were grown for 48 h and cells were plated on different media: YPD (reference plate) and 5-FOA/Canavanine (selective plate). After incubation, the colonies were counted and the GCR rate was determined by fluctuation analysis using FALCOR and the MSS maximum likelihood method [56].

### *RNA isolation*

RNA was isolated mainly according to the manufacturer's protocol. Briefly, cells were grown to an OD<sub>660</sub> of 0.8 and RNA was isolated using the "High Pure RNA Isolation Kit" (Roche). 10<sup>8</sup> cells in log phase were harvested and lysed with glass beads for 1 min in a FastPrep-24 (MP). RNA was quantified using a spectrophotometer and its quality was assessed on an agarose gel. cDNA was synthesized from 5 µg RNA using Superscript II Reverse Transcriptase (Invitrogen) and oligo(dT) as per the manufacturer's instructions. qPCR was performed with SsoAdvanced SYBR Green Supermix (Bio-Rad) using the primers mentioned in Supplemental File S4.
